# Supplementary material for: Low temperature preparation of crystalline ZrO2 coatings for improved elevated-temperature performances of Li-ion battery cathodes
Source: Royal Society of Chemistry journal article supplement (doi:10.1039/c2cc33522k), 2012-01-01
Supplement: c2cc33522k.pdf [file c2cc33522k.pdf]

## Electronic Supplementary Information

### Low Temperature Preparation of Crystalline ZrO<sub>2</sub> Coatings for Improved Elevated-Temperature Performances of Li-Ion Battery Cathodes

Jianqing Zhao<sup>a</sup>, Jianqiang Wang<sup>b</sup>, John C. Flake<sup>b</sup>, Ying Wang<sup>\*a</sup>

<sup>a</sup> Department of Mechanical Engineering, Louisiana State University, Baton Rouge, Louisiana 70803, USA. Fax: 001-225578 9162; Tel: 001- 2255788577; E-mail: [jzhao3@tigers.lsu.edu](mailto:jzhao3@tigers.lsu.edu).

<sup>b</sup> Department of Chemical Engineering, Louisiana State University, Baton Rouge, Louisiana 70803, USA. Tel: 001- 2255783060; E-mail: [johnflake@lsu.edu](mailto:johnflake@lsu.edu).

\* Corresponding author: Prof. Ying Wang  
Department of Mechanical Engineering, Louisiana State University, Baton Rouge, Louisiana 70803, USA. Fax: 001-225578 9162; Tel: 001-2255788577; E-mail: [ywang@lsu.edu](mailto:ywang@lsu.edu)

#### Experimental Section

##### *Preparation of bare composite electrode*

The LiMn<sub>2</sub>O<sub>4</sub> powders (99.5%) were purchased from Alfa Aesar without any further treatment. The bare composite electrode was composed of 80 % pristine LiMn<sub>2</sub>O<sub>4</sub> particles, 10 % acetylene black (conductive carbon, Alfa Aesar, 99.5%) and 10 % poly-vinylidene fluoride (PVDF, Alfa Aesar) as the binder.

##### *Atomic layer deposition of ZrO<sub>2</sub> coating on LiMn<sub>2</sub>O<sub>4</sub> particles and bare composite electrode*

Atomic layer deposition of ZrO<sub>2</sub> coating on LiMn<sub>2</sub>O<sub>4</sub> particles and bare composite electrodes was carried out in a Savannah 100 ALD system (Cambridge NanoTech Inc.) at 120°C using Zr(OC(CH<sub>3</sub>)<sub>3</sub>)<sub>4</sub> (Zirconium tert-butoxide, ZTB) and H<sub>2</sub>O as precursors with exposure time of 0.25 and 0.015 s, waiting time of 5 and 5 s and purge time of 60 and 40 s, respectively. The two self-terminating reactions involved in this ZrO<sub>2</sub> ALD growth are described in the following reactions:<sup>1</sup>

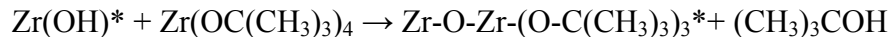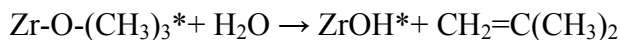

### *Characterizations*

The crystallographic structure of ZrO<sub>2</sub> ALD coated LiMn<sub>2</sub>O<sub>4</sub> particles were examined by using a Rigaku MiniFlex X-ray diffractometer with Cu K<sub>α</sub> radiation at a scan rate of 2°/min. The particle size of bare LiMn<sub>2</sub>O<sub>4</sub> particles and surface morphology of bare composite electrode were observed using a FEI Quanta 3D FEG field emission scanning electron microscopy (FESEM). Transmission electron microscopy (TEM) images were captured on a JEM-2010 instrument microscopy at an acceleration voltage of 200 kV, to investigate the characteristics of the ZrO<sub>2</sub> coatings. Surface compositions of LiMn<sub>2</sub>O<sub>4</sub> particles coated with 6 ZrO<sub>2</sub> ALD layers and LiMn<sub>2</sub>O<sub>4</sub> composite electrode coated with 6 ZrO<sub>2</sub> ALD layers were analyzed via X-ray photoelectron spectroscopy (XPS) using an AXIS 165 spectrometer using a twin-anode Al K<sub>α</sub> (1486.6 eV) X-ray source. All the XPS spectra were calibrated according to the binding energy of the C1s peak at 284.8 eV.

### *Electrochemical measurements*

Different electrodes were integrated into two-electrode CR2032-type coin cells for electrochemical measurements, with metallic lithium foil as anode, Celgard-2320 membrane as separator; electrolyte was 1 M LiPF<sub>6</sub> dissolved in ethylene carbonate (EC) and dimethyl carbonate (DMC) and diethyl carbonate (DEC) at a volumetric ratio of 1:1:1. Galvanostatic charge and discharge were performed at different current densities in a voltage range of 3.4 - 4.5 V using an 8-channel battery analyzer (MTI Corporation) at room temperature (25°C) and elevated temperature (55°C). The electrochemical impedance spectroscopy (EIS) of different

ZrO<sub>2</sub> ALD modified LiMn<sub>2</sub>O<sub>4</sub> electrodes were performed on VersaSTAT MC electrochemical analyzer (Princeton Applied Research) in a frequency range of 100 kHz-10 mHz by applying an AC amplitude of 5 mV.

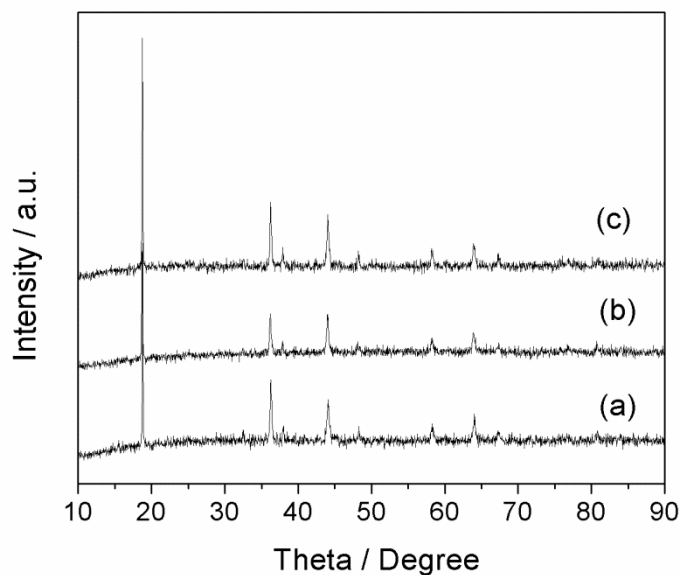

**Fig. S1** XRD patterns of (a) bare  $\text{LiMn}_2\text{O}_4$  particles, (b)  $\text{LiMn}_2\text{O}_4$  particles coated with 300  $\text{ZrO}_2$  ALD layers and (c) composite electrode ( $\text{LiMn}_2\text{O}_4$ :Carbon:PVDF=8:1:1 in weight ratio) coated with 300  $\text{ZrO}_2$  ALD layers. Three XRD patterns only present show spinel cubic  $\text{LiMn}_2\text{O}_4$  phase with a  $F3dm$  space group (JCPDS: 35-0782). No  $\text{ZrO}_2$  phase can be detected.

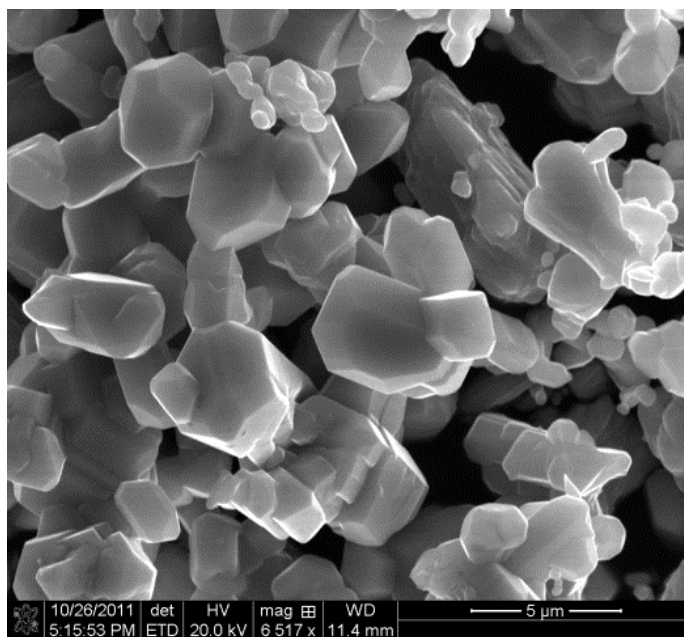

**Fig. S2** Scanning electron microscopy (SEM) image of bare  $\text{LiMn}_2\text{O}_4$  particles with an average particle size of  $\sim 5 \mu\text{m}$ .

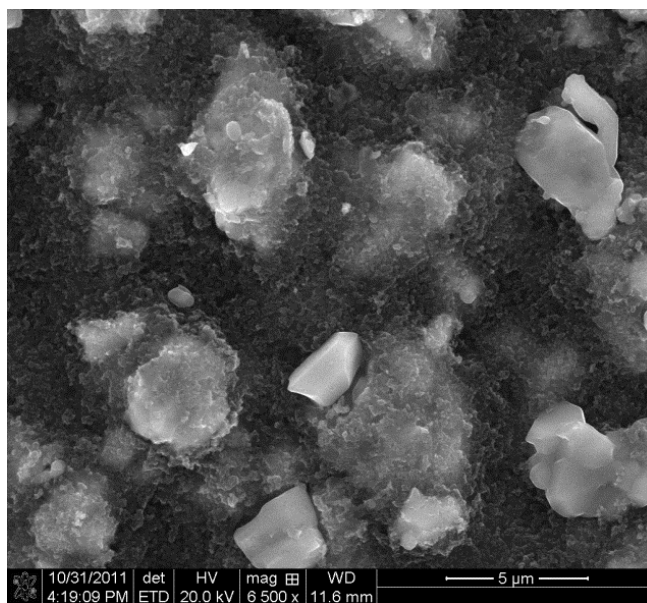

**Fig. S3** SEM image showing surface morphology of the bare composite electrode composed of 80 % pristine LiMn<sub>2</sub>O<sub>4</sub> particles, 10 % acetylene black and 10 % poly-vinylidene fluoride (PVDF) as the binder.

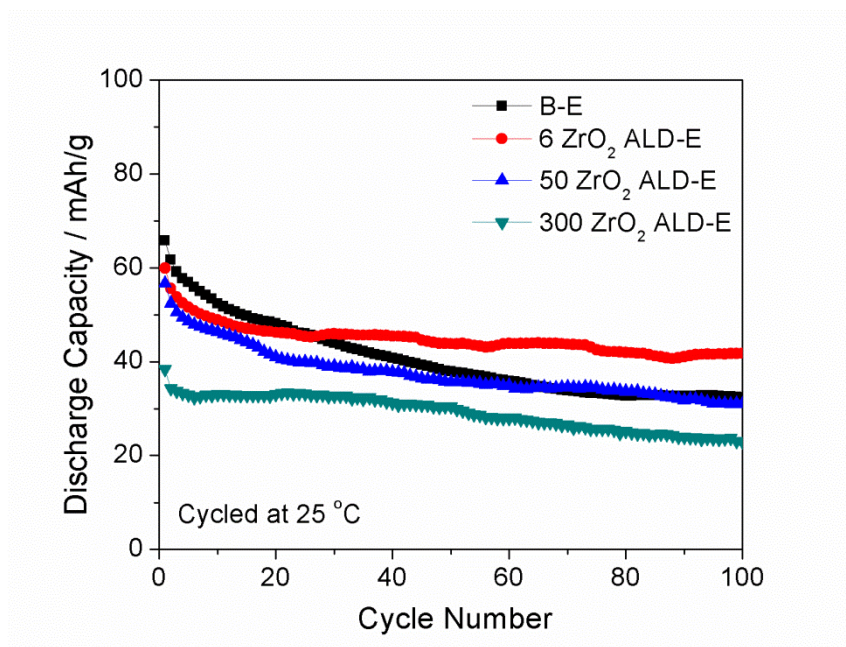

**Fig. S4** Cycling performance of bare LiMn<sub>2</sub>O<sub>4</sub> composite electrode and LiMn<sub>2</sub>O<sub>4</sub> composite electrodes coated with 6, 50, and 300 ZrO<sub>2</sub> ALD layers corresponding to the thickness of 1.74, 14.5 and 87 nm at a current density of 120 mAh/g in a voltage range of 3.4-4.5 V at room temperature (25°C).



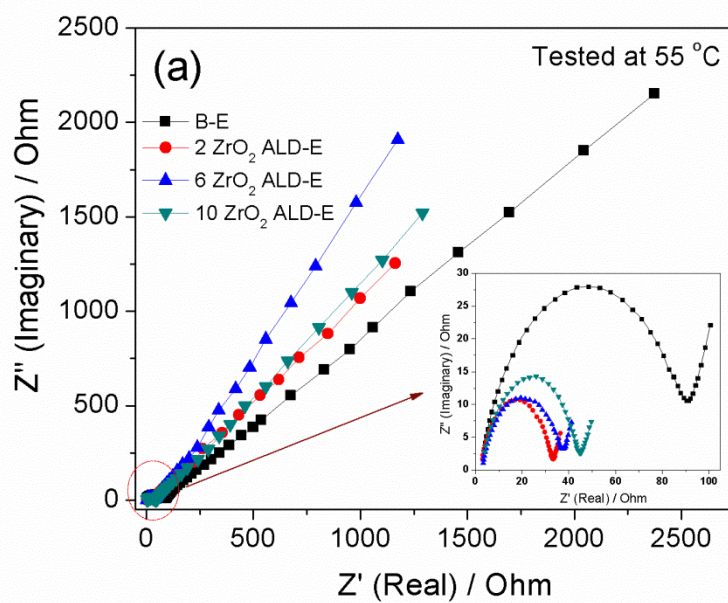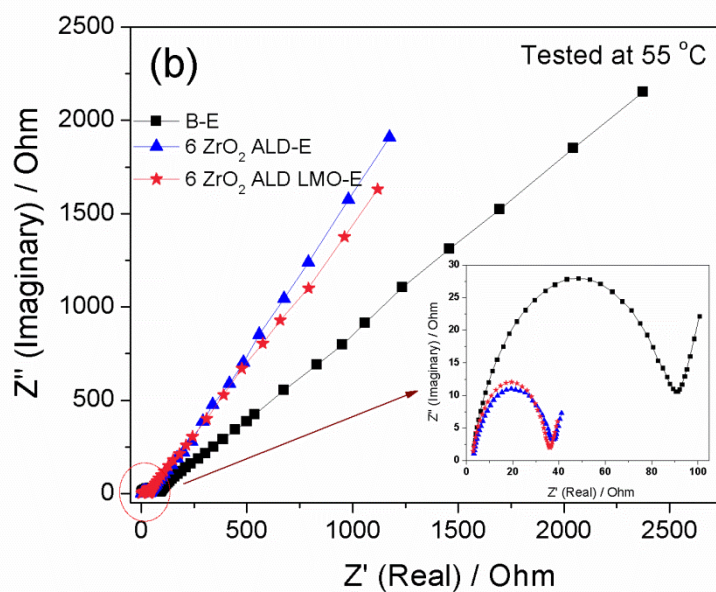

**Fig. S5** Electrochemical impedance spectra of different  $\text{ZrO}_2$ -ALD-modified  $\text{LiMn}_2\text{O}_4$  electrodes in comparison with bare electrode in a frequency range of 100 kHz - 10 mHz by applying an AC amplitude of 5 mV at  $55^\circ\text{C}$ . “B-E”: bare  $\text{LiMn}_2\text{O}_4$  composite electrode; “ $n$   $\text{ZrO}_2$  ALD-E”:  $\text{LiMn}_2\text{O}_4$  composite electrode coated with  $n$  ALD layers; “6  $\text{ZrO}_2$  ALD LMO-E”: electrode composed of  $\text{LiMn}_2\text{O}_4$  particles coated with 6  $\text{ZrO}_2$  ALD layers and uncoated carbon/PVDF network.



## References

- 1 M. A. Cameron and S.M. George, *Thin Solid Films*, 1999, **348**, 90.
